# Supplementary material for: TFLink: an integrated gateway to access transcription factor–target gene interactions for multiple species
Source: Oxford University Press journal article supplement (doi:10.1093/database/baac083), 2022-01-01
Supplement: baac083_supp.zip [file baac083_supp.zip]

Archive with 3 entries (3 files):
- Supplementary_Notes.pdf
- Supplementary_Table.xls
- Supplementary_Use_Cases.pdf
