# Supplementary material for: TFLink: an integrated gateway to access transcription factor–target gene interactions for multiple species
Source: Oxford University Press journal article supplement (doi:10.1093/database/baac083), 2022-01-01
Supplement: baac083_supp.zip [file baac083_supp.zip › Supplementary_Table.xls]

## Sheet: TF databases
Database name	URL	Publication	TFLink organisms	TF interactions	Binding site information	Clearly labelled experimental data	Experimental methods or publications are indicated	Freely accessible and can be redistributed	Intergrated into TFLink	Parts that were integrated into TFLink	Notes
ABS	http://genome.crg.es/datasets/abs2005/	Blanco,E. et al. (2006) ABS: a database of Annotated regulatory Binding Sites from orthologous promoters. Nucleic Acids Research, 34, D63–D67.	H. sapiens, M. musculus, R. norvegicus	no	yes	yes	no	?	no	-	Small binding site set (650 in total), only downloadable in gff format and no clear genomic locations are given (only locations relative to promoters in the database, for which only the sequence in downloadable).
ACTIVITY	no longer available		H. sapiens, M. musculus, R. norvegicus, S. cerevisiae, D. melanogaster	-	-			?	no	-	Non-functioning website.
AnimalTFDB	http://bioinfo.life.hust.edu.cn/AnimalTFDB/	Hu,H. et al. (2019) AnimalTFDB 3.0: a comprehensive resource for annotation and prediction of animal transcription factors. Nucleic Acids Research, 47, D33–D38.	H. sapiens, M. musculus, R. norvegicus, S. cerevisiae, D. melanogaster	not accessible	not accessible	-	-	?	no	-	Only TF and co-factor list and TF families and sequences are downloadable. All other data is just representation of other databases (interactions: PPIs from biogrid, binding sites: matrix images from Jaspar).
BloodChIP	no longer available	Chacon,D. et al. (2014) BloodChIP: a database of comparative genome-wide transcription factor binding profiles in human blood cells. Nucleic Acids Research, 42, D172–D177.	H. sapiens	yes	yes			?	no	-	Non-functioning website.
CardioTF	no longer available	Zhen,Y. (2016) CardioTF, a database of deconstructing transcriptional circuits in the heart system. PeerJ, 4, e2339.	H. sapiens, M. musculus, R. norvegicus, D. melanogaster	no	no			?	no	-	Non-functioning website.
ChIPBase	http://rna.sysu.edu.cn/chipbase/	Zhou,K.-R. et al. (2017) ChIPBase v2.0: decoding transcriptional regulatory networks of non-coding RNAs and protein-coding genes from ChIP-seq data. Nucleic Acids Research, 45, D43–D50.	H. sapiens, M. musculus, R. norvegicus, S. cerevisiae, D. melanogaster, C. elegans	yes	no	yes	yes	?	no	-	Supposed to be multispecies, only human/mouse available. Downloadable: predicted interactions based on chip-seq data. Chip-seq sets need to be downloaded separately (max. 15 expreinments at a time). Many downloads are not functioning. Regulator page part
CirGRDB	http://cirgrdb.biols.ac.cn/	Li,X. et al. (2018) CirGRDB: a database for the genome-wide deciphering circadian genes and regulators. Nucleic Acids Research, 46, D64–D70.	H. sapiens, M. musculus	yes	yes	yes	yes	?	no	-	Focuses on circadian genes and their regulators. We only integrate general TF databases, not specialized ones. In downloadable regulatory network, it is not clear which factors are transcription factors (only names are given).
cisRED	http://www.cisred.org/	Robertson,G. et al. (2006) cisRED: a database system for genome-scale computational discovery of regulatory elements. Nucleic Acids Research, 34, D68–D73.	H. sapiens, M. musculus, R. norvegicus, C. elegans	no	yes	no	yes	?	no	-	Computationally predicted regulatory regions within promoters – based on binding site motifs from Jaspar, Transfac, Oreganno.
CistromeMap	http://dc2.cistrome.org/	Zheng,R. et al. (2019) Cistrome Data Browser: expanded datasets and new tools for gene regulatory analysis. Nucleic Acids Research, 47, D729–D735.	H. sapiens, M. musculus	yes	yes	yes	yes	no	no	-	Collection of chip-seq datsets, with added quality control. Batch download available with permission, potential interactions might not be in there (they are only present in separate Cistrome toolKit website).
CMGSDB	https://bioinformatics.cs.vt.edu/cmgs/CMGSDB/	Pati,A. et al. (2008) CMGSDB: integrating heterogeneous Caenorhabditis elegans data sources using compositional data mining. Nucleic Acids Research, 36, D69–D76.	C. elegans	yes	no	no	yes	?	no	-	Regulatory interactions from Wormbase and Biogrid (from 2007). The website doesn’t seem to work. One download file is available (no information on methods).
CR Cistrome	no longer available	Wang,Qixuan et al. (2014) CR Cistrome: a ChIP-Seq database for chromatin regulators and histone modification linkages in human and mouse. Nucleic Acids Research, 42, D450–D458.	H. sapiens, M. musculus	no	no			?	no	-	Non-functioning website.
CTCF Binding Site Database	http://insulatordb.uthsc.edu/	Ziebarth,J.D. et al. (2013) CTCFBSDB 2.0: a database for CTCF-binding sites and genome organization. Nucleic Acids Research, 41, D188–D194.	H. sapiens, M. musculus, R. norvegicus, D. melanogaster	no	yes	yes	yes	yes	no	-	Focuses only of CTCF, a chromatin insulating TF, mostly chip data. We didn’t include it as it has data for only a single TF, and isn’t a general TF database.
DBD	http://www.transcriptionfactor.org/	Wilson,D. et al. (2008) DBD––taxonomically broad transcription factor predictions: new content and functionality. Nucleic Acids Research, 36, D88–D92.	H. sapiens, M. musculus, R. norvegicus, S. cerevisiae, D. melanogaster, C. elegans	no	no			?	no	-	Non-functioning website.
dbSUPER	http://bioinfo.au.tsinghua.edu.cn/dbsuper/	Khan,A. and Zhang,X. (2016) dbSUPER: a database of super-enhancers in mouse and human genome. Nucleic Acids Research, 44, D164–D171.	H. sapiens, M. musculus	no	no	yes	yes	?	no	-	Database of super enhancers. Technically based on histone modification and master TF chip-seq (mostly), but the database only contains the super enhancer positions, with only the “target” genes named, not TF specific.
DBTFLC	http://www.vit.ac.in/files/database/Home.php	Amalraj,T. et al. (2018) Database of transcription factors in lung cancer (DBTFLC): A novel resource for exploring transcription factors associated with lung cancer. Journal of Cellular Biochemistry, 119, 5253–5261.	H. sapiens	yes	no			?	no	-	Non-functioning website.
DoRothEA	https://saezlab.github.io/dorothea/index.html	Garcia-Alonso,L. et al. (2019) Benchmark and integration of resources for the estimation of human transcription factor activities. Genome Res., 29, 1363–1375.	H. sapiens	yes	no	yes	yes	yes	a part of	TF – protein coding target gene interactions, TF binding site locations, TF binding site sequence	Literature search/expreimental database part was integrated to TFLink.
DPRP	http://syslab.nchu.edu.tw/DPRP/	Tzeng,D.T.W. et al. (2014) DPRP: a database of phenotype-specific regulatory programs derived from transcription factor binding data. Nucleic Acids Research, 42, D178–D183.	H. sapiens	no	no			?	no	-	Non-functioning website.
ECRbase	http://ecrbase.dcode.org/	Loots,G. and Ovcharenko,I. (2007) ECRbase: database of evolutionary conserved regions, promoters, and transcription factor binding sites in vertebrate genomes. Bioinformatics, 23, 122–124.	H. sapiens, M. musculus, R. norvegicus	no	no	no	no	?	no	-	Binding site locations relative to promoters/ECRs in the database. Source and methods unclear. Can’t get exact location from files.
Factorbook	http://www.factorbook.org/	Wang,J. et al. (2013) Factorbook.org: a Wiki-based database for transcription factor-binding data generated by the ENCODE consortium. Nucleic Acids Research, 41, D171–D176.	H. sapiens, M. musculus	no	no	yes	yes	no	no	-	Collection of TF information and Chip-seq experiments of TFs. Tools for identifying peaks in genome reagions. No downloadable data available.
FASTFORWARD DNA	http://fastforward.sys-bio.net/	Thomas,P. et al. (2015) Computer-assisted curation of a human regulatory core network from the biological literature. Bioinformatics, 31, 1258–1266.	H. sapiens	yes	no	no	yes	?	no	-	Small collection of TF interactions, based on text mining from literature. No information on methods. Only TF-TF interactions. Evidence codes in process incluedd TF binding or efect on expression or mutational analysis. This might indicate non-direct regu
FlyFactorSurvey	http://mccb.umassmed.edu/ffs/	Zhu,L.J. et al. (2011) FlyFactorSurvey: a database of Drosophila transcription factor binding specificities determined using the bacterial one-hybrid system. Nucleic Acids Research, 39, D111–D117.	D. melanogaster	no	no	yes	yes	yes	no	-	Only some sequences w/o locations, not actual binding sites are provided.
FlyTF	https://www.mrc-lmb.cam.ac.uk/genomes/FlyTF/	Pfreundt,U. et al. (2010) FlyTF: improved annotation and enhanced functionality of the Drosophila transcription factor database. Nucleic Acids Research, 38, D443–D447.	D. melanogaster	not accessible	not accessible	no	no	?	no	-	list of TFs, with supported TF activity (or not)
GenomeTraFaC	no longer available	Jegga,A.G. et al. (2007) GenomeTrafac: a whole genome resource for the detection of transcription factor binding site clusters associated with conventional and microRNA encoding genes conserved between mouse and human gene orthologs. Nucleic Acids Researc	H. sapiens, M. musculus	no	no			?	no	-	Non-functioning website.
GTRD	http://gtrd.biouml.org/	Yevshin,I. et al. (2019) GTRD: a database on gene transcription regulation—2019 update. Nucleic Acids Res, 47, D100–D105.	H. sapiens, M. musculus	yes	yes	yes	yes	yes	a part of	TF – protein coding target gene interactions	ChIP-seq database, annotated interactions were included to TFLink.
hmChIP	http://jilab.biostat.jhsph.edu/database/cgi-bin/hmChIP.pl	Chen,L. et al. (2011) hmChIP: a database and web server for exploring publicly available human and mouse ChIP-seq and ChIP-chip data. Bioinformatics, 27, 1447–1448.	H. sapiens, M. musculus	no	yes	yes	yes	yes	no	-	A collection of separate peak files (out of date, not integrated), mapped to out of date human and mouse reference genomes. Better options exist now.
HOCOMOCO	http://hocomoco11.autosome.ru/	Kulakovskiy,I.V. et al. (2018) HOCOMOCO: towards a complete collection of transcription factor binding models for human and mouse via large-scale ChIP-Seq analysis. Nucleic Acids Research, 46, D252–D259.	H. sapiens, M. musculus	no	yes	-	-	yes	no	-	TF binding site matrix collection, based on HT-SELEX data (old version) and chip-seq data from GTRD (newer models). Actual peaks (binding site locations) already integrated from GTRD.
HTRIdb	http://www.lbbc.ibb.unesp.br/htri	Bovolenta,L.A. et al. (2012) HTRIdb: an open-access database for experimentally verified human transcriptional regulation interactions. BMC Genomics, 13, 405.	H. sapiens	yes	no	yes	yes	yes	yes	TF – protein coding target gene interactions
JASPAR	http://jaspar.genereg.net/	Fornes,O. et al. (2020) JASPAR 2020: update of the open-access database of transcription factor binding profiles. Nucleic Acids Res, 48, D87–D92.	H. sapiens, M. musculus, R. norvegicus, S. cerevisiae, D. melanogaster, C. elegans	no	yes	yes	yes	yes	a part of	TF binding site locations, TF binding site sequences	Only locations and sequences in species of interest, no motifs, no other species were integrated to TFLink.
MachiBase	http://machibase.gi.k.u-tokyo.ac.jp/	Ahsan,B. et al. (2009) MachiBase: a Drosophila melanogaster 5?-end mRNA transcription database. Nucleic Acids Research, 37, D49–D53.	D. melanogaster	no	no	yes	yes	yes	no	-	Refers to itself as a transcription database, but has gene expression and TSS data in differnet Drosophila life stages. No regulatory information is available.
MeDReaders	http://medreader.org/home	Wang,G. et al. (2018) MeDReaders: a database for transcription factors that bind to methylated DNA. Nucleic Acids Research, 46, D146–D151.	H. sapiens, M. musculus	no	yes	yes	yes	yes	no	-	TF binding site data of methylated DNA – not a general database. The database mostly contains binding site sequences (without locations) and Logos. Actual binding sites are predicted from these motifs.
mTFkb	http://sunlab.cpy.cuhk.edu.hk/mTFkb/	Sun,K. et al. (2017) mTFkb: a knowledgebase for fundamental annotation of mouse transcription factors. Scientific Reports, 7, 3022.	M. musculus	no	no	-	-	yes	no	-	TF expression patterns from RNA-seq data. No regulatory information is provided. The PPIs provided by the STRING database (doesn’t seem to be up anymore).
MYBS	no longer available	Tsai,H.-K. et al. (2007) MYBS: a comprehensive web server for mining transcription factor binding sites in yeast. Nucleic Acids Research, 35, W221–W226.	S. cerevisiae	yes	yes			?	no	-	Non-functioning website.
OnTheFly	https://bhapp.c2b2.columbia.edu/OnTheFly/	Shazman,S. et al. (2014) OnTheFly: a database of Drosophila melanogaster transcription factors and their binding sites. Nucleic Acids Research, 42, D167–D171.	D. melanogaster	no	no	yes	yes	no	no	-	TF structure and binding motifs collected from other sites. No downloading options.
ORegAnno	http://www.oreganno.org/	Lesurf,R. et al. (2016) ORegAnno 3.0: a community-driven resource for curated regulatory annotation. Nucleic Acids Res, 44, D126–D132.	H. sapiens, M. musculus, R. norvegicus, S. cerevisiae, D. melanogaster, C. elegans	yes	yes	yes	yes	yes	a part of	TF – protein coding target gene interactions, TF binding site locations, TF binding site sequences	Only data from species of interest were incuded to TFLink.
PathoDB	http://gene-regulation.com/cgi-bin/pub/databases/pathodb/search.cgi	Wingender,E. et al. (2000) TRANSFAC: an integrated system for gene expression regulation. Nucleic Acids Research, 28, 316–319.	H. sapiens, M. musculus	no	no	-	-	no	no	-	Database of pathological forms of Tfs, sort of a side database of TRANSFAC (not freely available).
PAZAR	no longer available	Portales-Casamar,E. et al. (2007) PAZAR: a framework for collection and dissemination of cis-regulatory sequence annotation. Genome Biology, 8, R207.	H. sapiens, M. musculus	yes	yes	yes	varies	yes	no	-	Non-functioning website.
PReMod	http://genomequebec.mcgill.ca/PReMod/	Ferretti,V. et al. (2007) PReMod: a database of genome-wide mammalian cis-regulatory module predictions. Nucleic Acids Research, 35, D122–D126.	H. sapiens	yes	no	no	no	yes	no	-	Predicted regulatory modules, on out of date genome assemblies (e.g. human: hg17).
PsychENCODE	https://www.synapse.org//#!Synapse:syn4921369/wiki/235539	Akbarian,S. et al. (2015) The PsychENCODE project. Nature Neuroscience, 18, 1707–1712.	H. sapiens, M. musculus	no	no	yes	yes	no	no	-	Data on gene expression and regulation in brain. This is a portal for a large project, all data is found in smaller projects. Some have TF of histone modification ChIP-seq data, but none of this is clearly labelled in the file directory, every project is
REDfly	http://redfly.ccr.buffalo.edu/	Rivera,J. et al. (2019) REDfly: the transcriptional regulatory element database for Drosophila. Nucleic Acids Res, 47, D828–D834.	D. melanogaster	yes	yes	yes	yes	yes	yes	TF – protein coding target gene interactions, TF binding site locations, TF binding site sequences
REGULATOR	http://www.bioinformatics.org/regulator/page.php	Wang,K. and Nishida,H. (2015) REGULATOR: a database of metazoan transcription factors and maternal factors for developmental studies. BMC Bioinformatics, 16, 114.	H. sapiens, M. musculus, R. norvegicus, D. melanogaster, S. cerevisiae	not accessible	no	-	-	?	no	-	General descriptions of TFs, PPIs linked from the STRING, IntAct, MINT, and DIP databases. TFs and maternal factors related to development (specified content).
ReMap	http://remap.univ-amu.fr/	Chèneby,J. et al. (2018) ReMap 2018: an updated atlas of regulatory regions from an integrative analysis of DNA-binding ChIP-seq experiments. Nucleic Acids Res, 46, D267–D275.	H. sapiens	no	yes	yes	yes	yes	a part of	TF – protein coding target gene interactions, based on overlaps with ReMap peak files	Only interactions inferred from ChIP peak locations – based on promoter overlap – were integrated to TFLink.
rSNP_Guide	no longer available	Ponomarenko,J.V. et al. (2003) rSNP_Guide, a database system for analysis of transcription factor binding to DNA with variations: application to genome annotation. Nucleic Acids Research, 31, 118–121.	H. sapiens, M. musculus	no	no			?	no	-	Non-functioning website.
ScerTF	http://stormo.wustl.edu/ScerTF	Spivak,A.T. and Stormo,G.D. (2012) ScerTF: a comprehensive database of benchmarked position weight matrices for Saccharomyces species. Nucleic Acids Res, 40, D162–D168.	S. cerevisiae	not accessible	no	yes	yes	yes	no	-	It is a yeast database. Only optimal binding site matrices are available for download. In the portal there are interactions (only a list of genes) with a link to the source article – mostly ChIP-chip and deletion studies, but there are predicted data.
SCPD	http://rulai.cshl.edu/SCPD/	Zhu,J. and Zhang,M.Q. (1999) SCPD: a promoter database of the yeast Saccharomyces cerevisiae. Bioinformatics, 15, 607–611.	S. cerevisiae	not accessible	not accessible	no	no	?	no	-	Out of date database containing a small amount of data. There are expreimental interactions and binding sequences (with no locations). Only browsable and not downloadable.
SELEX_DB	http://wwwmgs.bionet.nsc.ru/mgs/systems/selex/	Ponomarenko,J.V. et al. (2000) SELEX_DB: an activated database on selected randomized DNA/RNA sequences addressed to genomic sequence annotation. Nucleic Acids Research, 28, 205–208.	H. sapiens, M. musculus, R. norvegicus, D. melanogaster, C. elegans, S. cerevisiae	no	yes	yes	yes	no	no	-	Out of date database containing SELEX binding site sequences (without locations).
SM-TF	http://zoulab.dalton.missouri.edu/SM-TF/	Xu,X. et al. (2016) SM-TF: A structural database of small molecule-transcription factor complexes. Journal of Computational Chemistry, 37, 1559–1564.	H. sapiens, M. musculus, R. norvegicus, D. melanogaster, S. cerevisiae	no	no	no	no	?	no	-	Collection of small molecule – TF 3D complexes.
SNP2TFBS	http://ccg.vital-it.ch/snp2tfbs/	Kumar,S. et al. (2017) SNP2TFBS – a database of regulatory SNPs affecting predicted transcription factor binding site affinity. Nucleic Acids Research, 45, D139–D144.	H. sapiens	no	no	no	no	?	no	-	Database of SNPs that predicted to effect TF binding.
SwissRegulon	http://swissregulon.unibas.ch/sr/swissregulon	Pachkov,M. et al. (2013) SwissRegulon, a database of genome-wide annotations of regulatory sites: recent updates. Nucleic Acids Research, 41, D214–D220.	H. sapiens, M. musculus, S. cerevisiae,	no	yes	no	no	?	no	-	Predicted, uses expreimental data as basis.
TcoF-DB	http://cbrc.kaust.edu.sa/tcof/	Schaefer,U. et al. (2011) TcoF-DB: dragon database for human transcription co-factors and transcription factor interacting proteins. Nucleic Acids Research, 39, D106–D110.	H. sapiens	no	no	yes	yes	?	no	-	PPIs between TFs and transcriptional co-factors.
TFBSbank	http://tfbsbank.co.uk/	Chen,D. et al. (2017) TFBSbank: a platform to dissect the big data of protein–DNA interaction in human and model species. Nucleic Acids Research, 45, D151–D157.	H. sapiens, M. musculus,D. melanogaster, C. elegans, S. cerevisiae	yes	yes	yes	yes	?	no	-	Collection of ChIP-seq datasets, with target genes assigned (based on peaks). Non-functioning downloads part.
TFBSshape	http://rohslab.cmb.usc.edu/TFBSshape/	Yang,L. et al. (2014) TFBSshape: a motif database for DNA shape features of transcription factor binding sites. Nucleic Acids Research, 42, D148–D155.	H. sapiens, M. musculus, R. norvegicus, D. melanogaster, C. elegans, S. cerevisiae	no	no	no	no	?	no	-	Predicted DNA shape info (at binding sites), based on binding matices.
TFCat	no longer available	Fulton,D.L. et al. (2009) TFCat: the curated catalog of mouse and human transcription factors. Genome Biology, 10, R29.	H. sapiens, M. musculus	no	no			?	no	-	Non-functioning website.
TFcheckpoint	http://www.tfcheckpoint.org/	Chawla,K. et al. (2013) TFcheckpoint: a curated compendium of specific DNA-binding RNA polymerase II transcription factors. Bioinformatics, 29, 2519–2520.	H. sapiens, M. musculus, R. norvegicus	no	no			?	no	-	Non-functioning website.
TFClass	http://tfclass.bioinf.med.uni-goettingen.de/	Wingender,E. et al. (2018) TFClass: expanding the classification of human transcription factors to their mammalian orthologs. Nucleic Acids Research, 46, D343–D347.	H. sapiens, M. musculus, R. norvegicus	no	no	no	no	?	no	-	Non-functioning website.
TRANSCompel®	http://www.gene-regulation.com/pub/databases.html#transcompel	Kel-Margoulis,O.V. et al. (2002) TRANSCompel®: a database on composite regulatory elements in eukaryotic genes. Nucleic Acids Research, 30, 332–334.	H. sapiens, M. musculus, R. norvegicus	no	no	-	-	no	no	-	TRANSFAC side database.
TRANSFAC	http://gene-regulation.com/pub/databases.html	Wingender,E. et al. (1996) TRANSFAC: a database on transcription factors and their DNA binding sites. Nucleic Acids Res, 24, 238–241.	H. sapiens, M. musculus, R. norvegicus, S. cerevisiae, D. melanogaster, C. elegans	no	not accessible	yes	yes	no	no	-
TransmiR	http://www.cuilab.cn/transmir	Tong,Z. et al. (2019) TransmiR v2.0: an updated transcription factor-microRNA regulation database. Nucleic Acids Research, 47, D253–D258.	H. sapiens, M. musculus, D. melanogaster, C. elegans	yes	no	yes	yes	yes	no	-	TF – microRNA regulations (not a general TF database).
TRANSPATH®	http://gene-regulation.com/pub/databases.html#transpath	Krull,M. et al. (2003) TRANSPATH ® : an integrated database on signal transduction and a tool for array analysis. Nucleic Acids Research, 31, 97–100.	H. sapiens, M. musculus, R. norvegicus, D. melanogaster, C. elegans, S. cerevisiae	no	no	-	-	no	no	-	PPIs in pathways. Can’t check content (TRANSFAC registration required).
TRED	http://rulai.cshl.edu/cgi-bin/TRED/tred.cgi?process=home	Jiang,C. et al. (2007) TRED: a transcriptional regulatory element database, new entries and other development. Nucleic Acids Res, 35, D137–D140.	H. sapiens, M. musculus	yes	no	yes	yes	yes	yes	TF – protein coding target gene interactions
TRRD	http://wwwmgs.bionet.nsc.ru/mgs/gnw/trrd/	Kolchanov,N.A. et al. (2002) Transcription Regulatory Regions Database (TRRD): its status in 2002. Nucleic Acids Research, 30, 312–317.	H. sapiens, M. musculus, R. norvegicus, D. melanogaster, C. elegans, S. cerevisiae	yes	yes	no	yes	no	no	-	Says it’s commercial, though one can still make queries. Large relational database, can be queried in multiple flat files. Information about methods is not clear. Not entirely clear what data are predicted.
TRRUST	http://www.grnpedia.org/trrust/	Han,H. et al. (2018) TRRUST v2: an expanded reference database of human and mouse transcriptional regulatory interactions. Nucleic Acids Res, 46, D380–D386.	H. sapiens, M. musculus	yes	no	yes	yes	yes	yes	TF – protein coding target gene interactions
TrSDB	http://bioinf.uab.es/cgi-bin/trsdb-current/trsdb.pl	Hermoso,A. et al. (2004) TrSDB: a proteome database of transcription factors. Nucleic Acids Research, 32, D171–D173.	H. sapiens, M. musculus, R. norvegicus, D. melanogaster, C. elegans, S. cerevisiae	no	no	no	yes	?	no	-	Proteome analyses on TFs (predicted TFs based on structure).
UniPROBE	http://thebrain.bwh.harvard.edu/uniprobe/	Newburger,D.E. and Bulyk,M.L. (2009) UniPROBE: an online database of protein binding microarray data on protein–DNA interactions. Nucleic Acids Research, 37, D77–D82.	H. sapiens, M. musculus, D. melanogaster, C. elegans, S. cerevisiae	no	no	yes	yes	?	no	-	PBM database. Like SELEX, this provides potential TF binding site sequences, not true in vivo loccations.
Yeastract	http://www.yeastract.com/	Monteiro,P.T. et al. (2020) YEASTRACT+: a portal for cross-species comparative genomics of transcription regulation in yeasts. Nucleic Acids Res, 48, D642–D649.	S. cereviaisae	yes	no	yes	yes	yes	yes	TF – protein coding target gene interactions
YeTFaSCo	http://yetfasco.ccbr.utoronto.ca/	de Boer,C.G. and Hughes,T.R. (2012) YeTFaSCo: a database of evaluated yeast transcription factor sequence specificities. Nucleic Acids Res, 40, D169–D179.	S. cereviaisae	no	no	yes	yes	?	no	-	Yeast binding site matrices and predicted motifs are available.
YTRP	http://cosbi3.ee.ncku.edu.tw/YTRP/	Yang,T.-H. et al. (2014) YTRP: a repository for yeast transcriptional regulatory pathways. Database, 2014.	S. cereviaisae	yes	no	yes	yes	?	no	-	Interaction information from Yeastract, which is already included in TFLink. Supposed to separate the info into direct and non-direct regulation. Actual evidence info needs to be downloaded for all TFs separately.

## Sheet: Explanation
Colouring	Was integrated into TFLink
	Non-functioning website.
Abbreviations	TF	Transcription factor
	H. sapiens	Homo sapiens
	M. musculus	Mus musculus
	R. norvegicus	Rattus norvegicus
	D. rerio	Danio rerio
	D. melanogaster	Drosophila melanogaster
	C. elegans	Caenorhabditis elegans
	S. cerevisiae	Saccharomyces cerevisiae
